# Supplementary material for: Targeting Myofibroblasts in Model Systems of Fibrosis by an Artificial α-Smooth Muscle-Actin Promoter Hybrid
Source: Springer Nature journal article supplement (doi:10.1007/s12033-009-9186-4), 2009-06-24
Supplement: 12033_2009_9186_MOESM1_ESM.pdf [file 12033_2009_9186_MOESM1_ESM.pdf]

Short title: Genetic targeting of myofibroblasts

**Supplementary Figure S1:** Reporter activity of deletion constructs of the upstream region of SMA gene in SMA-negative L6 myoblasts, cultivated in 5% FCS in DMEM and in SMA-positive L6 myotubes, induced to differentiate into myotubes by 48 h serum deprivation (0.5 % FCS in DMEM).

**Supplementary Figure S2:** Mesangial cells myofibroblastically induced by high glucose treatment (4.5 g glucose L<sup>-1</sup> culture medium) and transduced with pAd-SMA-GFP driving reporter expression by the artificial SMA-promoter hybrid, shown in figure 2A (a-c). a) DAPI stained, b) SMA immunostained and c) GFP reporter fluorescence.

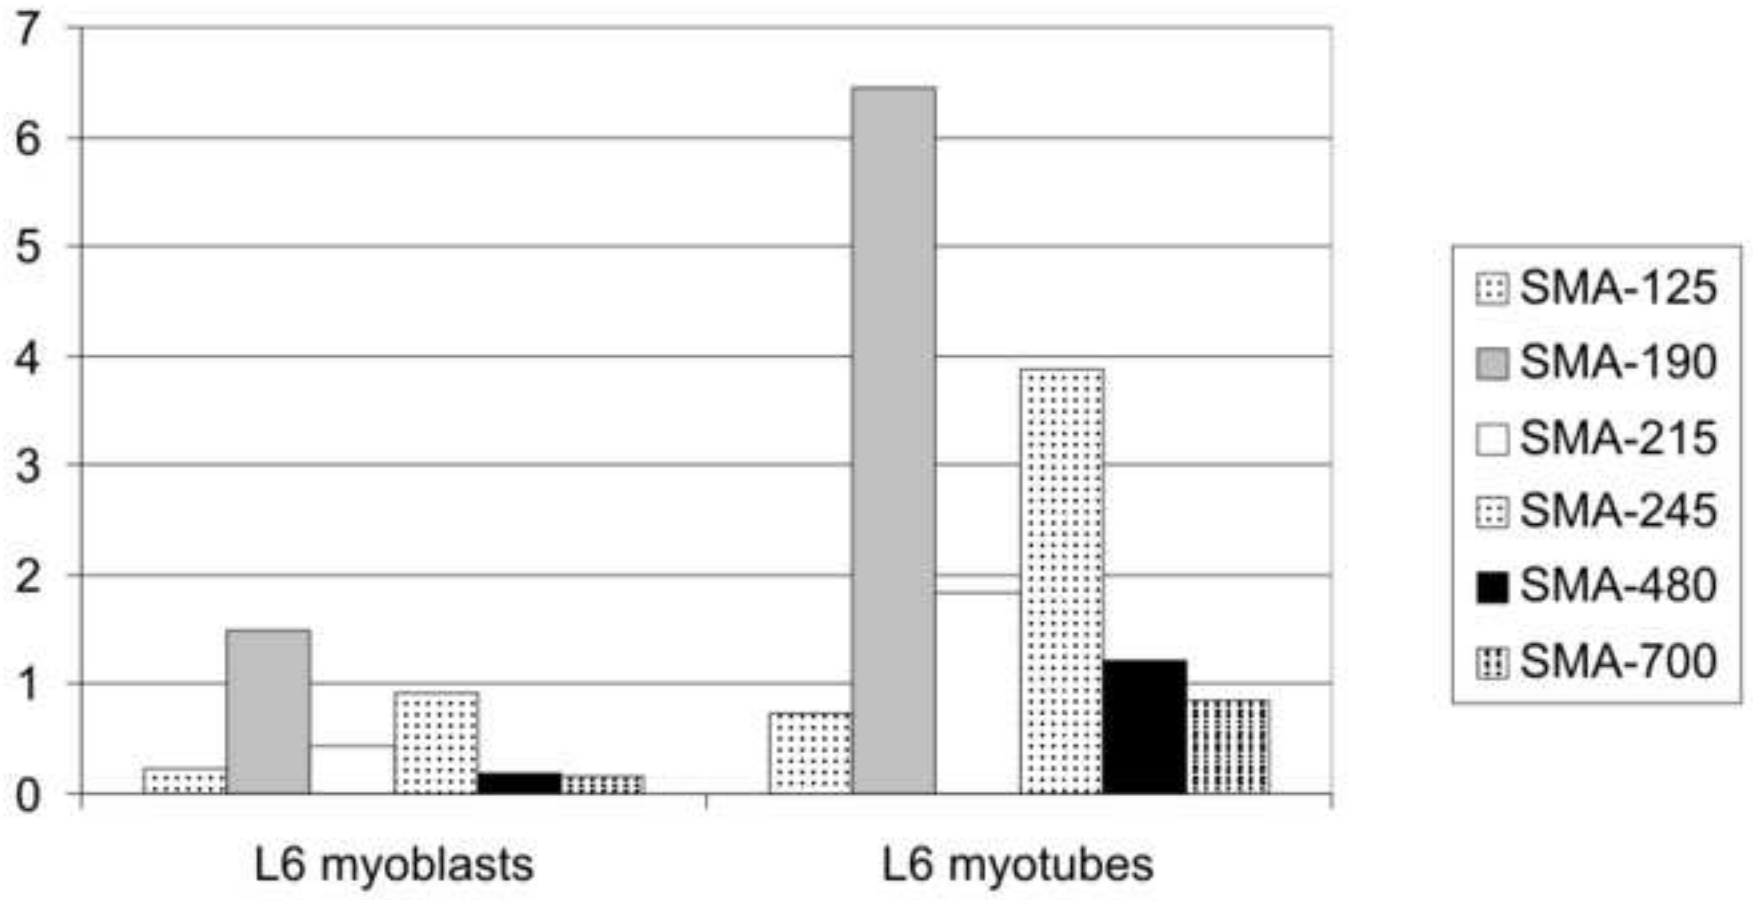

**Figure S1**

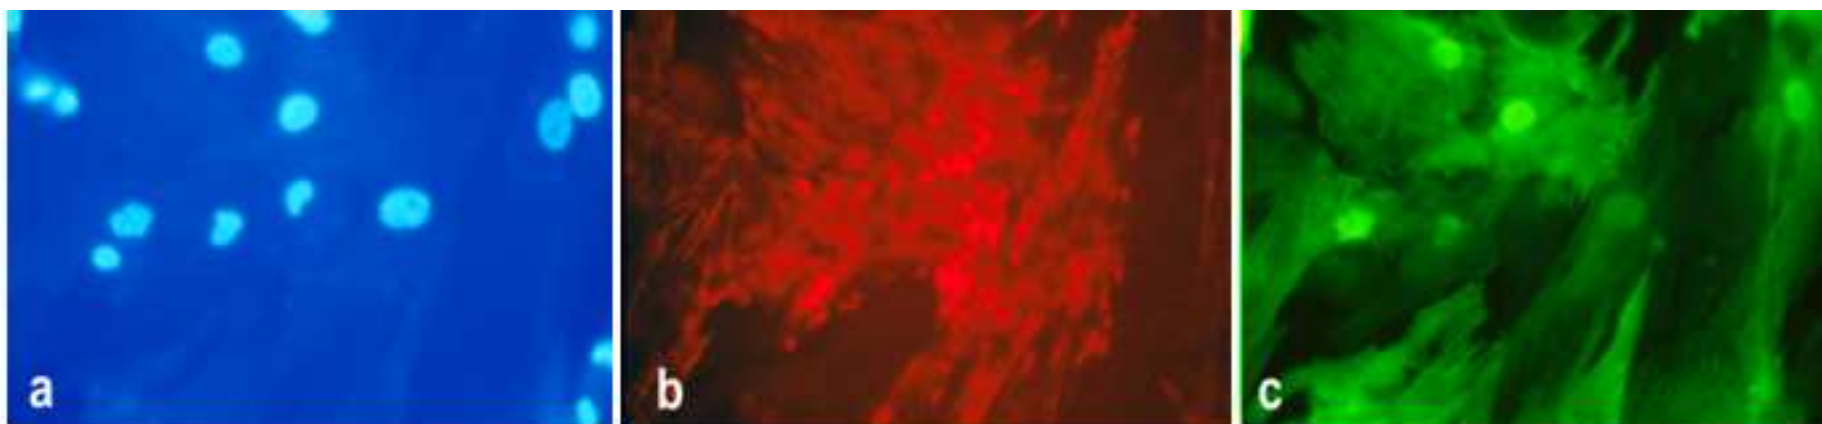

**Figure S2**
